# Supplementary material for: Scandium-doped zinc cadmium oxide as a new stable n-type oxide thermoelectric material
Source: Royal Society of Chemistry journal article supplement (doi:10.1039/c6ta03126a), 2016-01-01
Supplement: c6ta03126a1.pdf [file c6ta03126a1.pdf]

# Scandium-doped Zinc Cadmium Oxide as New Stable n-type Oxide

## Thermoelectric Materials

L. Han,<sup>a†</sup> D. V. Christensen,<sup>a</sup> A. Bhowmik,<sup>a</sup> S. B. Simonsen,<sup>a</sup> L. T. Hung,<sup>a</sup> E. Abdellahi,<sup>a</sup> Y. Z. Chen,<sup>a</sup> N. V. Nong,<sup>a</sup>  
S. Linderoth,<sup>a</sup> and N. Pryds<sup>a†</sup>

<sup>a</sup> *Department of Energy Conversion and Storage, Technical University of Denmark, DK-4000 Roskilde, Denmark.*

<sup>†</sup> *Corresponding author: ihan@dtu.dk, npr@dtu.dk*

### Table of Contents:

1. Calculated results from Rietveld refinements of XRD spectrums
2. Parameters used for Callaway model.
3. Calculated phonon density of states for  $\text{Zn}_{0.875}\text{Cd}_{0.125}\text{O}$  and  $\text{ZnO}$  by DFT calculation.
4. TE properties of the conventional  $\text{Zn}_{0.98}\text{Al}_{0.02}\text{O}_{1.03}$  samples and new  $\text{Zn}_{0.9}\text{Cd}_{0.1}\text{Sc}_{0.02}\text{O}_{1.03}$  samples under the influence of annealing in air at 1073K for 72 hours.

## 1. Calculated results from Rietveld refinements of XRD spectrums

Table S1 Results from Rietveld refinement for  $Zn_{1-x}Cd_xSc_{0.02}O_{1.03}$  ( $x = 0$  to  $0.15$ ) samples.

| Sample                                                                       | Main phase: Zincite |                        |          |          |                               |                    | Secondary phase |                        |          |          |                               |                    | R-Values         |                 |      |
|------------------------------------------------------------------------------|---------------------|------------------------|----------|----------|-------------------------------|--------------------|-----------------|------------------------|----------|----------|-------------------------------|--------------------|------------------|-----------------|------|
|                                                                              | Space group         | Lattice parameters (Å) |          |          | Cell Volume (Å <sup>3</sup> ) | Wt% - Rietveld (%) | Space group     | Lattice parameters (Å) |          |          | Cell Volume (Å <sup>3</sup> ) | Wt% - Rietveld (%) | R <sub>exp</sub> | R <sub>wp</sub> | GO F |
|                                                                              |                     | a                      | b        | c        |                               |                    |                 | a                      | b        | c        |                               |                    |                  |                 |      |
| ZnSc <sub>0.02</sub> O <sub>1.03</sub>                                       | P63m<br>c           | 3.2<br>5               | 3.2<br>5 | 5.2<br>0 | 47.59                         | 99.440             | I213            | 9.8<br>4               | 9.8<br>4 | 9.8<br>4 | 954.5                         | 0.560              | 2.9<br>5         | 10.<br>6        | 3.62 |
| Zn <sub>0.95</sub> Cd <sub>0.05</sub> Sc <sub>0.02</sub> O <sub>1.03</sub>   | P63m<br>c           | 3.2<br>7               | 3.2<br>7 | 5.2<br>3 | 48.38                         | 99.276             | I213            | 9.8<br>4               | 9.8<br>4 | 9.8<br>4 | 953.5                         | 0.724              | 3.6<br>6         | 8.6<br>9        | 2.37 |
| Zn <sub>0.9</sub> Cd <sub>0.1</sub> Sc <sub>0.02</sub> O <sub>1.03</sub>     | P63m<br>c           | 3.2<br>8               | 3.2<br>8 | 5.2<br>5 | 49.18                         | 99.683             | I213            | 9.8<br>5               | 9.8<br>5 | 9.8<br>5 | 956.5                         | 0.317              | 3.5<br>4         | 7.4<br>1        | 2.09 |
| Zn <sub>0.875</sub> Cd <sub>0.125</sub> Sc <sub>0.02</sub> O <sub>1.03</sub> | P63m<br>c           | 3.2<br>9               | 3.2<br>9 | 5.2<br>5 | 49.33                         | 97.817             | Fm3<br>m        | 4.6<br>9               | 4.6<br>9 | 4.6<br>9 | 103.33                        | 2.183              | 3.8<br>1         | 8.9<br>9        | 2.36 |
| Zn <sub>0.85</sub> Cd <sub>0.15</sub> Sc <sub>0.02</sub> O <sub>1.03</sub>   | P63m<br>c           | 3.2<br>8               | 3.2<br>8 | 5.2<br>4 | 48.98                         | 93.392             | Fm3<br>m        | 4.6<br>9               | 4.6<br>9 | 4.6<br>9 | 103.18                        | 6.608              | 3.6<br>1         | 8.8<br>0        | 2.44 |

Table S2 Results from Rietveld refinement for  $Zn_{0.9}Cd_{0.1}Sc_yO_{1+1.5y}$  ( $y = 0$  to  $0.04$ ) samples.

| Sample                                                                    | Main phase: Zincite |                        |      |      |                               |                    | Secondary phase |                        |      |      |                               |                    | R-Values         |                 |      |
|---------------------------------------------------------------------------|---------------------|------------------------|------|------|-------------------------------|--------------------|-----------------|------------------------|------|------|-------------------------------|--------------------|------------------|-----------------|------|
|                                                                           | Space group         | Lattice parameters (Å) |      |      | Cell Volume (Å <sup>3</sup> ) | Wt% - Rietveld (%) | Space group     | Lattice parameters (Å) |      |      | Cell Volume (Å <sup>3</sup> ) | Wt% - Rietveld (%) | R <sub>exp</sub> | R <sub>wp</sub> | GOF  |
|                                                                           |                     | a                      | b    | c    |                               |                    |                 | a                      | b    | c    |                               |                    |                  |                 |      |
| Zn <sub>0.9</sub> Cd <sub>0.1</sub> O                                     | P63mc               | 3.28                   | 3.28 | 5.25 | 49.06                         | 100                | -               | -                      | -    | -    | -                             | -                  | 2.89             | 9.69            | 3.35 |
| Zn <sub>0.9</sub> Cd <sub>0.1</sub> Sc <sub>0.01</sub> O <sub>1.015</sub> | P63mc               | 3.29                   | 3.29 | 5.25 | 49.14                         | 100                | -               | -                      | -    | -    | -                             | -                  | 3.53             | 7.70            | 2.18 |
| Zn <sub>0.9</sub> Cd <sub>0.1</sub> Sc <sub>0.02</sub> O <sub>1.03</sub>  | P63mc               | 3.29                   | 3.29 | 5.25 | 49.18                         | 99.683             | I213            | 9.85                   | 9.85 | 9.85 | 956.5                         | 0.317              | 3.54             | 7.41            | 2.09 |
| Zn <sub>0.9</sub> Cd <sub>0.1</sub> Sc <sub>0.03</sub> O <sub>1.045</sub> | P63mc               | 3.29                   | 3.29 | 5.25 | 49.18                         | 99.059             | I213            | 9.85                   | 9.85 | 9.85 | 955.2                         | 0.941              | 3.57             | 8.08            | 2.27 |
| Zn <sub>0.9</sub> Cd <sub>0.1</sub> Sc <sub>0.04</sub> O <sub>1.06</sub>  | P63mc               | 3.29                   | 3.29 | 5.25 | 49.10                         | 98.618             | I213            | 9.85                   | 9.85 | 9.85 | 954.5                         | 1.382              | 3.57             | 8.08            | 2.27 |

## 2. Parameters used for Callaway model

Table S3 An overview of the parameters used in Callaway calculations.

| Sample                | ZnSc <sub>0.02</sub> O <sub>1.03</sub> | Zn <sub>0.95</sub> Cd <sub>0.05</sub> Sc <sub>0.02</sub> O <sub>1.03</sub> | Zn <sub>0.9</sub> Cd <sub>0.1</sub> Sc <sub>0.02</sub> O <sub>1.03</sub> | Zn <sub>0.875</sub> Cd <sub>0.125</sub> Sc <sub>0.02</sub> O <sub>1.03</sub> | Zn <sub>0.85</sub> Cd <sub>0.15</sub> Sc <sub>0.02</sub> O <sub>1.03</sub> |
|-----------------------|----------------------------------------|----------------------------------------------------------------------------|--------------------------------------------------------------------------|------------------------------------------------------------------------------|----------------------------------------------------------------------------|
| $\theta/K$            | 400                                    | 400                                                                        | 400                                                                      | 400                                                                          | 400                                                                        |
| $v/ms^{-1}$           | 3097                                   | 3097                                                                       | 3097                                                                     | 3097                                                                         | 3097                                                                       |
| $\alpha/K^{-4}s^{-1}$ | 230                                    | 1600                                                                       | 3200                                                                     | 3900                                                                         | 2900                                                                       |
| $\beta/K^{-5}s^{-1}$  | 0.015                                  | 0.015                                                                      | 0.015                                                                    | 0.015                                                                        | 0.015                                                                      |
| L/m                   | $1 \times 10^{-5}$                     | $3 \times 10^{-6}$                                                         | $4.5 \times 10^{-6}$                                                     | $4 \times 10^{-6}$                                                           | $3 \times 10^{-6}$                                                         |

| Sample                | Zn <sub>0.9</sub> Cd <sub>0.1</sub> Sc <sub>0.006</sub> O <sub>1.00</sub> | Zn <sub>0.9</sub> Cd <sub>0.1</sub> Sc <sub>0.01</sub> O <sub>1.015</sub> | Zn <sub>0.9</sub> Cd <sub>0.1</sub> Sc <sub>0.02</sub> O <sub>1.0</sub> | Zn <sub>0.9</sub> Cd <sub>0.1</sub> Sc <sub>0.03</sub> O <sub>1.045</sub> | Zn <sub>0.9</sub> Cd <sub>0.1</sub> Sc <sub>0.04</sub> O <sub>1.06</sub> |
|-----------------------|---------------------------------------------------------------------------|---------------------------------------------------------------------------|-------------------------------------------------------------------------|---------------------------------------------------------------------------|--------------------------------------------------------------------------|
| $\theta/K$            | 400                                                                       | 400                                                                       | 400                                                                     | 400                                                                       | 400                                                                      |
| $v/ms^{-1}$           | 3097                                                                      | 3097                                                                      | 3097                                                                    | 3097                                                                      | 3097                                                                     |
| $\alpha/K^{-4}s^{-1}$ | 3050                                                                      | 3100                                                                      | 3200                                                                    | 3300                                                                      | 3400                                                                     |
| $\beta/K^{-5}s^{-1}$  | 0.015                                                                     | 0.015                                                                     | 0.015                                                                   | 0.015                                                                     | 0.015                                                                    |
| L/m                   | $5 \times 10^{-6}$                                                        | $5 \times 10^{-6}$                                                        | $4.5 \times 10^{-6}$                                                    | $4 \times 10^{-6}$                                                        | $3.5 \times 10^{-6}$                                                     |

### 3. Calculated phonon density of states for $\text{Zn}_{0.875}\text{Cd}_{0.125}\text{O}$ and $\text{ZnO}$ by DFT calculation

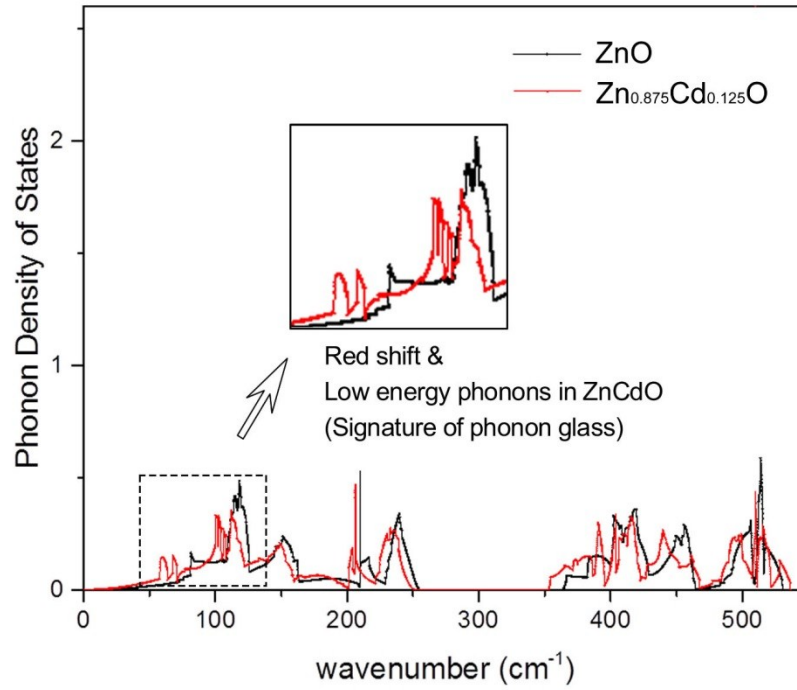

**Fig. S1** Calculated phonon density of states for  $\text{Zn}_{0.875}\text{Cd}_{0.125}\text{O}$  and  $\text{ZnO}$  by DFT calculation

#### 4. Supplement TE properties

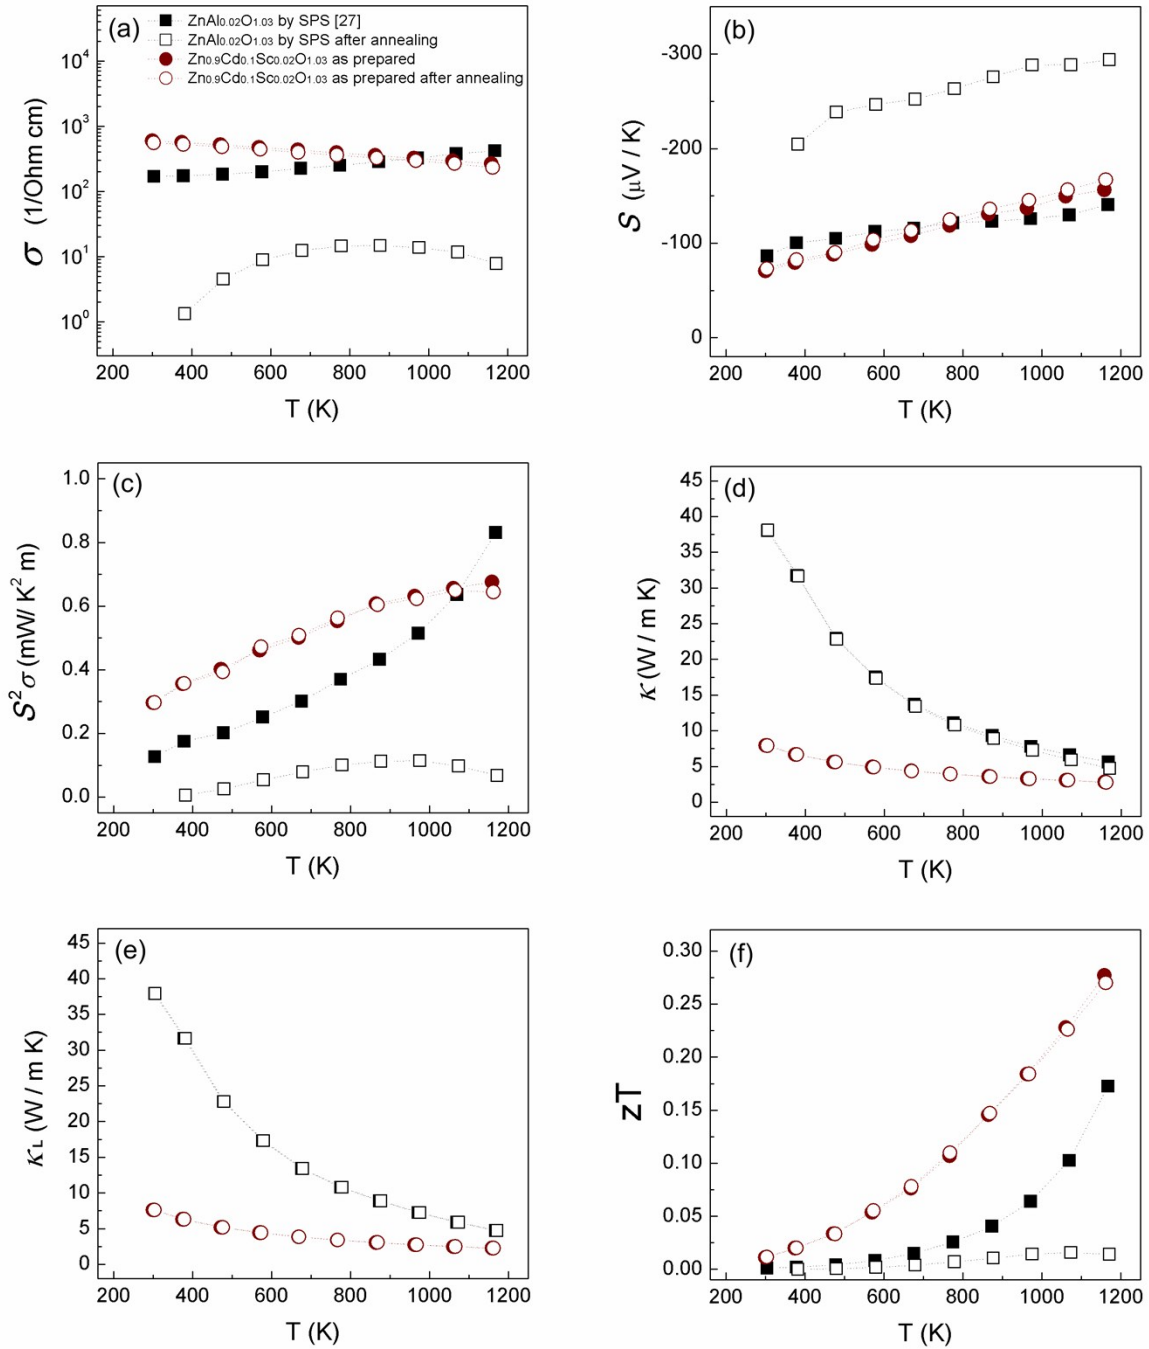

**Fig. S2** TE properties of the conventional Zn<sub>0.98</sub>Al<sub>0.02</sub>O<sub>1.03</sub> samples and new Zn<sub>0.9</sub>Cd<sub>0.1</sub>Sc<sub>0.02</sub>O<sub>1.03</sub> samples under the influence of annealing in air at 1073K for 72 hours.
